# Supplementary material for: Adiposity and cancer risk: new mechanistic insights from epidemiology
Source: Springer Nature journal article supplement (doi:10.1038/nrc3967), 2015-07-24
Supplement: 41568_2015_BFnrc3967_MOESM207_ESM.pdf [file 41568_2015_BFnrc3967_MOESM207_ESM.pdf]

Supplementary Information S1 | **Summary of findings from epidemiological studies (2006 to 2012) that report associations between serum adiponectin levels and risk of different types of cancer, condensed from Dalamaga et al. review.<sup>1</sup>**

| Site        | Prospective (within) cohorts | Case-control | Summary conclusions                                                                                                                                            |
|-------------|------------------------------|--------------|----------------------------------------------------------------------------------------------------------------------------------------------------------------|
| Pancreatic  | 2                            | 4            | Generally, inverse associations between higher versus lower concentrations, most noticeable in never smokers                                                   |
| Breast      | 1                            | 8            | Generally, inverse associations between higher versus lower concentrations, perhaps linked more with ER positive breast cancer                                 |
| Endometrial | 2                            | 3            | Generally, inverse associations between higher versus lower concentrations                                                                                     |
| Prostate    | 2                            | 3            | Generally, inverse associations between higher versus lower concentrations, with suggestion that association was most significant for advanced prostate cancer |
| Colorectal  | 2                            | 10           | Generally, inverse associations between higher versus lower concentrations                                                                                     |
| Liver       | 1                            | 2            | Mixed associations                                                                                                                                             |
| Renal       | 0                            | 1            | Inverse associations between higher versus lower concentrations                                                                                                |
| Lung        | 0                            | 3            | No difference in mean adiponectin levels between cases and controls                                                                                            |

1. Dalamaga, M., Diakopoulos, K.N. & Mantzoros, C.S. The role of adiponectin in cancer: a review of current evidence. *Endocr Rev* **33**, 547-94 (2012).
